# Supplementary material
Source: HighWire-hosted journal article supplement (https://www.cmaj.ca/highwire/filestream/80068/field_highwire_adjunct_files/0/210170-res-1-at.pdf)
Supplement: 210170-res-1-at.pdf [file 210170-res-1-at.pdf]

**Supplemental Table 1.** Baseline characteristics in the two highest risk vigintiles versus the remainder of the waitlist cohort.

| Variable                                       | Everyone Else<br>N=18,580 | Top Two Vigintiles<br>N=2,003 | P-Value |
|------------------------------------------------|---------------------------|-------------------------------|---------|
| <b>Demographics</b>                            |                           |                               |         |
| Age, Mean $\pm$ SD, y                          | 66.36 (10.92)             | 67.05 (10.16)                 | 0.007   |
| Age, Median (IQR), y                           | 67 (60-74)                | 67 (60-74)                    | 0.1     |
| Female sex, No. (%)                            | 4,903 (26.4%)             | 480 (24.0%)                   | 0.02    |
| BMI, Mean $\pm$ SD, kg/m <sup>2</sup>          | 28.96 (5.51)              | 28.28 (5.25)                  | <.0001  |
| BMI, Median (IQR), kg/m <sup>2</sup>           | 28 (25-32)                | 28 (25-31)                    | <.0001  |
| Rural residence, No. (%)                       | 2,841 (15.3%)             | 255 (12.7%)                   | 0.002   |
| Hospital type, No. (%)                         |                           |                               |         |
| Community                                      | 4,863 (26.2%)             | 219 (10.9%)                   | <.0001  |
| Teaching                                       | 13,717 (73.8%)            | 1,784 (89.1%)                 |         |
| Waitlisted during inpatient encounter, No. (%) | 93 (0.5%)                 | 1,117 (55.8%)                 | <.0001  |
| <b>Comorbidities</b>                           |                           |                               |         |
| Hypertension, No. (%)                          | 15,396 (82.9%)            | 1,802 (90.0%)                 | <.0001  |
| Atrial fibrillation, No. (%)                   | 2,110 (11.4%)             | 391 (19.5%)                   | <.0001  |
| Recent MI, No. (%)                             | 427 (2.3%)                | 411 (20.5%)                   | <.0001  |
| CCS classification, No. (%)                    |                           |                               |         |
| 0                                              | 7,068 (38.0%)             | 186 (9.3%)                    | <.0001  |
| 1                                              | 2,716 (14.6%)             | 329 (16.4%)                   |         |
| 2                                              | 4,849 (26.1%)             | 247 (12.3%)                   |         |
| 3                                              | 3,800 (20.5%)             | 382 (19.1%)                   |         |
| 4                                              | 131 (0.7%)                | 280 (14.0%)                   |         |
| Low-risk ACS                                   | *11-15                    | 377 (18.8%)                   |         |
| Intermediate-risk ACS                          | *1-5                      | 191 (9.5%)                    |         |

|                                                  |                |               |        |
|--------------------------------------------------|----------------|---------------|--------|
| High-risk ACS                                    | 0 (0.0%)       | 11 (0.5%)     |        |
| LM or LM equivalent disease,<br>No. (%)          | 5,345 (28.8%)  | 1,013 (50.6%) | <.0001 |
| Proximal LAD disease, No. (%)                    | 5,814 (31.3%)  | 1,004 (50.1%) | <.0001 |
| Previous PCI, No. (%)                            | 1,841 (9.9%)   | 299 (14.9%)   | <.0001 |
| Left ventricular ejection<br>fraction, No. (%)   |                |               |        |
| ≥ 50%                                            | 14,731 (79.3%) | 1,310 (65.4%) | <.0001 |
| 35-49%                                           | 2,864 (15.4%)  | 431 (21.5%)   |        |
| 20-35%                                           | 851 (4.6%)     | 220 (11.0%)   |        |
| < 20%                                            | 134 (0.7%)     | 42 (2.1%)     |        |
| NYHA classification, No. (%)                     |                |               |        |
| 1                                                | 10,863 (58.5%) | 1,435 (71.6%) | <.0001 |
| 2                                                | 4,301 (23.1%)  | 164 (8.2%)    |        |
| 3                                                | 3,278 (17.6%)  | 269 (13.4%)   |        |
| 4                                                | 138 (0.7%)     | 135 (6.7%)    |        |
| Heart failure, No. (%)                           | 4,161 (22.4%)  | 754 (37.6%)   | <.0001 |
| Moderate-severe mitral<br>regurgitation, No. (%) | 2,265 (12.2%)  | 99 (4.9%)     | <.0001 |
| Moderate-severe aortic<br>regurgitation, No. (%) | 769 (4.1%)     | 30 (1.5%)     | <.0001 |
| Severe aortic stenosis, No. (%)                  | 6,240 (33.6%)  | 336 (16.8%)   | <.0001 |
| Endocarditis, No. (%)                            |                |               |        |
| None                                             | 18,435 (99.2%) | 1,985 (99.1%) | 0.01   |
| Acute                                            | 35 (0.2%)      | 10 (0.5%)     |        |
| Subacute                                         | 110 (0.6%)     | 8 (0.4%)      |        |
| Cerebrovascular disease, No.<br>(%)              | 1,629 (8.8%)   | 246 (12.3%)   | <.0001 |

|                                               |                |               |        |
|-----------------------------------------------|----------------|---------------|--------|
| Peripheral arterial disease, No. (%)          | 2,382 (12.8%)  | 325 (16.2%)   | <.0001 |
| Smoking status, No. (%)                       |                |               |        |
| Never                                         | 9,231 (49.7%)  | 905 (45.2%)   | <.0001 |
| Current                                       | 2,835 (15.3%)  | 384 (19.2%)   |        |
| Former                                        | 6,514 (35.1%)  | 714 (35.6%)   |        |
| COPD, No. (%)                                 | 4,001 (21.5%)  | 514 (25.7%)   | <.0001 |
| Diabetes, No. (%)                             | 7,130 (38.4%)  | 1,012 (50.5%) | <.0001 |
| Dyslipidemia, No. (%)                         | 12,335 (66.4%) | 1,435 (71.6%) | <.0001 |
| GFR, Mean $\pm$ SD, mL/min/1.73m <sup>2</sup> | 86.36 (33.75)  | 80.16 (33.84) | <.0001 |
| GFR, Median (IQR), mL/min/1.73m <sup>2</sup>  | 82 (63-105)    | 76 (57-99)    | <.0001 |
| Dialysis, No. (%)                             | 305 (1.6%)     | 68 (3.4%)     | <.0001 |
| Anemia, No. (%)                               | 654 (3.5%)     | 156 (7.8%)    | <.0001 |
| Liver disease, No. (%)                        | 162 (0.9%)     | 28 (1.4%)     | 0.02   |
| Alcohol abuse, No. (%)                        | 138 (0.7%)     | 27 (1.3%)     | 0.004  |
| Dementia, No. (%)                             | 221 (1.2%)     | 25 (1.2%)     | 0.8    |
| Depression, No. (%)                           | 118 (0.6%)     | 24 (1.2%)     | 0.004  |
| Psychosis, No. (%)                            | 19 (0.1%)      | *1-5          | 0.5    |
| Primary cancer, No. (%)                       | 872 (4.7%)     | 116 (5.8%)    | 0.03   |
| Metastatic cancer, No. (%)                    | 110 (0.6%)     | 8 (0.4%)      | 0.3    |

---

### Operative characteristics

|                          |               |               |        |
|--------------------------|---------------|---------------|--------|
| Surgery type, No. (%)    |               |               |        |
| CABG                     | 9,089 (48.9%) | 1,579 (78.8%) | <.0001 |
| Valve                    | 6,152 (33.1%) | *208-212      |        |
| CABG + Valve             | 2,497 (13.4%) | 211 (10.5%)   |        |
| Thoracic Aorta           | 842 (4.5%)    | *1-5          |        |
| Redo-Sternotomy, No. (%) | 674 (3.6%)    | 70 (3.5%)     | 0.8    |

|                             |               |               |        |
|-----------------------------|---------------|---------------|--------|
| Cardiogenic Shock, No. (%)  | 10 (0.1%)     | *1-5          | 0.4    |
| Operative priority, No. (%) |               |               |        |
| Urgent                      | 6,462 (34.8%) | 561 (28.0%)   | <.0001 |
| Semi-urgent                 | 3,164 (17.0%) | 789 (39.4%)   |        |
| Elective                    | 8,954 (48.2%) | 653 (32.6%)   |        |
| Recommend maximum wait      |               |               |        |
| time, Mean $\pm$ SD, d      | 44.37 (34.88) | 37.09 (27.54) | <.0001 |
| Recommend maximum wait      |               |               |        |
| time, Median (IQR), d       | 42 (14-73)    | 31 (14-55)    | <.0001 |
| Adherence to recommended    |               |               |        |
| wait time**, No. (%)        | 9,565 (51.5%) | 1,327 (66.3%) | <.0001 |

\* Data suppressed due to small counts.

\*\* Adherence is defined as adhering to procedure-specific wait times recommended by the Canadian Cardiovascular Society Access to Care Working Group (1).

**Abbreviations:** SD = standard deviation; IQR = interquartile range; BMI = body mass index; MI = myocardial infarction; CCS = Canadian Cardiovascular Society; ACS = acute coronary syndrome; LM = left main; LAD = left anterior descending; PCI = percutaneous coronary intervention; LVEF = left ventricular ejection fraction; NYHA = New York Heart Association; COPD = chronic obstructive pulmonary disease; GFR = glomerular filtration rate; CABG = coronary artery bypass grafting

## REFERENCES

1. Canadian Cardiovascular Society Access to Care Working Group. Wait-time benchmarks for cardiovascular services and procedures. It's about time: Achieving benchmarks and best practices in wait time management. Final report by the Wait Time Alliance for Timely Access to Health Care [Internet]. 2005 April 17, 2021:[68-87 pp.]. Available from: [https://www.waittimealliance.ca/wp-content/uploads/2014/05/Cardiovascular\\_Services\\_and\\_Procedures.pdf](https://www.waittimealliance.ca/wp-content/uploads/2014/05/Cardiovascular_Services_and_Procedures.pdf).
